# Supplementary material for: Pesticide Use Modifies the Association Between Genetic Variants on Chromosome 8q24 and Prostate Cancer
Source: Oxford University Press journal article supplement (doi:10.1158/0008-5472.can-10-1078), 2010-10-26
Supplement: 00085472can101078-sup-stab_2.xls [file 00085472can101078-sup-stab_2.xls]

## Sheet: All main effects
Supplemental Table 2. Main effect for all SNPs evaluated on chromosome 8 in the AHS and risk of prostate cancer.
CHR	Position	SNP	HW p	MAF	OR	L95	U95	P-trend	P 2DF
8	126517971	rs2235108	0.707	0.2996	0.9037	0.7884	1.036	0.1461	0.3236
8	128232156	rs17446916	0.4244	0.4567	1.059	0.9363	1.197	0.3623	0.6594
8	128241210	rs7002343	0.4256	0.3614	0.9768	0.86	1.11	0.718	0.9359
8	128241868	rs2124600	0.4288	0.3675	0.9359	0.8234	1.064	0.311	0.528
8	128251633	rs2456461	0.8723	0.4322	0.9251	0.8168	1.048	0.2206	0.4462
8	128257201	rs2466024	0.3879	0.4205	0.935	0.8256	1.059	0.2904	0.5418
8	128262163	rs2456449	0.91	0.368	0.9433	0.8297	1.072	0.3721	0.6448
8	128266262	rs2456452	0.9513	0.316	1.123	0.9846	1.28	0.08395	0.1121
8	128266270	rs2445610	0.9555	0.3831	0.9495	0.8356	1.079	0.4265	0.6419
8	128266477	rs16902008	0.05362	0.04385	0.8321	0.6079	1.139	0.2512	0.4103
8	128278791	rs2466031	0.7879	0.4237	0.9456	0.8338	1.072	0.383	0.6835
8	128279002	rs2466032	0.5079	0.3241	0.9407	0.8227	1.076	0.3717	0.6346
8	128280411	rs2466035	0.6345	0.3298	0.9559	0.838	1.09	0.5014	0.7184
8	128281776	rs2445614	0.6809	0.2586	0.9673	0.8401	1.114	0.6442	0.8884
8	128282415	rs9643217	0.3477	0.07631	0.9706	0.7702	1.223	0.8	0.9562
8	128294622	rs7816475	0.1618	0.2349	1.069	0.9258	1.234	0.363	0.4537
8	128298045	rs10087719	0.09951	0.2764	1.07	0.9347	1.225	0.3263	0.2668
8	128309583	rs10505481	0.01746	0.2405	0.9997	0.8676	1.152	0.9972	0.4166
8	128316227	rs2044869	0.1765	0.2859	1.012	0.8847	1.158	0.8615	0.8763
8	128321036	rs17377068	0.01929	0.2249	0.9926	0.8584	1.148	0.9198	0.3305
8	128322175	rs283741	0.7892	0.4373	1.028	0.9068	1.165	0.6683	0.3784
8	128331109	rs6992922	0.04225	0.2146	0.9788	0.8433	1.136	0.7778	0.2024
8	128336520	rs10099034	5.568e-05	0.221	1.033	0.8962	1.191	0.6545	0.7333
8	128340162	rs4871014	0.3875	0.24	1.088	0.9436	1.255	0.2452	0.155
8	128345535	rs716889	0.1098	0.03591	0.7288	0.5072	1.047	0.08717	0.2319
8	128347495	rs2122835	0.158	0.2872	1.057	0.9225	1.211	0.4244	0.1737
8	128351093	rs1011387	1	0.03525	0.9881	0.7065	1.382	0.9441	0.5148
8	128358094	rs283709	0.242	0.1136	0.9866	0.8124	1.198	0.8916	0.5254
8	128358773	rs283710	0.4748	0.2436	1.115	0.9672	1.285	0.1336	0.2103
8	128360760	rs4871780	0.707	0.4267	0.9908	0.876	1.121	0.8837	0.5397
8	128362648	rs185852	0.6189	0.1979	1.171	1.007	1.362	0.04065	0.1046
8	128364892	rs412835	0.667	0.4244	1.014	0.8958	1.148	0.8267	0.9649
8	128376264	rs283718	0.1925	0.4249	0.9762	0.8614	1.106	0.7063	0.622
8	128378019	rs17450934	0.5638	0.1307	1.07	0.8942	1.28	0.4601	0.7376
8	128379147	rs283720	0.6396	0.2689	1.039	0.9059	1.191	0.5862	0.5985
8	128379675	rs283721	0.7181	0.125	1.017	0.8457	1.222	0.8603	0.6356
8	128380741	rs2007197	0.1149	0.1591	0.9237	0.7794	1.095	0.3601	0.3626
8	128389320	rs6984136	0.0007432	0.04668	1.078	0.8194	1.418	0.5918	0.5944
8	128391125	rs1995613	0.01186	0.06328	1.147	0.9054	1.452	0.2561	0.4837
8	128392363	rs445114	0.9109	0.3766	0.8686	0.7636	0.9882	0.03228	0.08275
8	128404855	rs620861	0.8223	0.3741	0.8771	0.771	0.9977	0.04611	0.0959
8	128406423	rs377649	0.8735	0.4944	0.9341	0.8247	1.058	0.2839	0.523
8	128408608	rs424281	0.7495	0.4574	1.075	0.9499	1.217	0.251	0.5026
8	128410090	rs16902104	0.4942	0.1334	1.123	0.9408	1.34	0.1992	0.1462
8	128410862	rs587948	0.8274	0.405	0.8934	0.7872	1.014	0.08094	0.1721
8	128412048	rs17464492	0.7498	0.2903	0.884	0.7687	1.016	0.08344	0.2112
8	128413130	rs7838714	0.957	0.4218	1.093	0.9659	1.237	0.1584	0.212
8	128413806	rs687279	0.2581	0.301	0.9427	0.8239	1.079	0.3908	0.5935
8	128414645	rs672888	0.1112	0.3966	0.9307	0.8217	1.054	0.2582	0.5179
8	128416306	rs391640	0.464	0.2029	0.876	0.7482	1.025	0.09957	0.1442
8	128419697	rs13249993	0.751	0.4603	1.076	0.9512	1.216	0.245	0.495
8	128423495	rs13271658	0.1218	0.1752	0.9666	0.8241	1.134	0.6769	0.6623
8	128423967	rs10095860	0.5428	0.3163	0.966	0.8469	1.102	0.6062	0.4959
8	128424201	rs10098985	0.9134	0.4141	1.106	0.9768	1.251	0.1121	0.1221
8	128425408	rs13256275	0.00394	0.4939	0.9158	0.8074	1.039	0.1709	0.2722
8	128426400	rs16902124	0.01266	0.0425	1.122	0.8434	1.492	0.4292	0.7015
8	128426999	rs13267780	0.02001	0.2341	0.8933	0.77	1.036	0.1367	0.1697
8	128430423	rs7014657	0.8288	0.4182	1.093	0.9654	1.237	0.1607	0.1444
8	128434155	rs12156034	0.2039	0.09116	0.9601	0.7755	1.189	0.7087	0.875
8	128435786	rs11782735	0.1589	0.1417	0.974	0.8132	1.167	0.7751	0.4547
8	128437695	rs9693995	0.7082	0.4436	0.9217	0.8144	1.043	0.1972	0.1811
8	128444552	rs9283954	0.5779	0.3822	1.113	0.9815	1.263	0.09509	0.1405
8	128446650	rs4143118	0.6696	0.4396	0.9185	0.8119	1.039	0.1769	0.3153
8	128447808	rs2060775	0.943	0.2426	0.8562	0.7381	0.9933	0.04042	0.1224
8	128451539	rs16902126	0.4827	0.4201	1.1	0.9715	1.246	0.1326	0.1073
8	128451670	rs11776260	0.24	0.1438	0.9713	0.8124	1.161	0.7493	0.4703
8	128455738	rs2121631	0.9496	0.2948	0.8588	0.7477	0.9864	0.03127	0.09841
8	128457034	rs1562430	0.4509	0.4206	1.081	0.9546	1.224	0.2199	0.1133
8	128457540	rs12677432	0.01265	0.03732	1.141	0.8414	1.547	0.3964	0.4125
8	128459842	rs731900	0.2876	0.1807	1.034	0.8802	1.215	0.6826	0.8706
8	128460139	rs16902131	0.7557	0.09347	1.072	0.8712	1.318	0.5127	0.2468
8	128460719	rs750816	0.8637	0.1885	0.8553	0.7262	1.007	0.06124	0.1732
8	128463720	rs1949808	0.5442	0.2657	1.039	0.9039	1.195	0.5892	0.7281
8	128465498	rs6986543	0.7688	0.3378	1.064	0.9335	1.212	0.3533	0.6136
8	128465694	rs896324	1	0.1033	1.031	0.8433	1.26	0.7658	0.8698
8	128469358	rs7820981	0.8729	0.4409	0.8946	0.7896	1.013	0.08023	0.2127
8	128470954	rs1562871	0.6877	0.2059	1.015	0.8715	1.182	0.8486	0.7688
8	128472089	rs12549845	0.1033	0.2808	0.9201	0.7992	1.059	0.2465	0.2052
8	128472135	rs10441525	0.6584	0.1379	1.097	0.9204	1.307	0.3014	0.3634
8	128472696	rs7844673	0.7949	0.0539	1.308	1.016	1.684	0.03736	0.06201
8	128473069	rs10956365	0.6088	0.1905	1.034	0.8851	1.208	0.673	0.8996
8	128476625	rs10505477	0.4302	0.4969	0.7918	0.6982	0.8981	0.0002798	0.001366
8	128477298	rs10505476	0.4212	0.2345	1.317	1.146	1.513	0.000101	0.0005207
8	128478693	rs10808555	0.5227	0.3458	0.9868	0.8654	1.125	0.8433	0.9769
8	128480639	rs10505475	0.4011	0.03294	1.442	1.046	1.988	0.02561	NA
8	128481192	rs17467139	0.8125	0.05817	1.436	1.127	1.829	0.003416	0.009787
8	128482487	rs6983267	0.6731	0.4861	0.8102	0.7146	0.9186	0.001021	0.004537
8	128486686	rs10505474	0.9136	0.4118	1.21	1.068	1.372	0.002865	0.01134
8	128487118	rs10505473	0.9122	0.1382	1.113	0.9336	1.327	0.2325	0.4076
8	128489740	rs13248944	0.6594	0.03252	1.331	0.9608	1.843	0.08553	0.1341
8	128492309	rs7837328	0.87	0.4095	1.209	1.066	1.371	0.003111	0.01207
8	128493974	rs7014346	0.3397	0.3736	1.147	1.009	1.304	0.03628	0.1112
8	128497243	rs4871789	0.6358	0.4862	1.159	1.025	1.312	0.01871	0.06151
8	128498903	rs6985419	0.954	0.3515	1.104	0.9714	1.255	0.1296	0.3166
8	128500876	rs7842552	0.6036	0.2818	1.168	1.021	1.337	0.02361	0.05422
8	128509349	rs9297756	1	0.1425	1.053	0.8826	1.257	0.5642	0.4588
8	128510110	rs6999921	1	0.08899	1.086	0.8766	1.344	0.4516	0.6073
8	128522947	rs10090421	0.5597	0.2358	1.076	0.9307	1.244	0.322	0.612
8	128524836	rs6981397	0.5408	0.3127	0.9616	0.8404	1.1	0.5695	0.8331
8	128524876	rs7831606	0.9204	0.1551	1.035	0.8722	1.229	0.6908	0.4854
8	128526872	rs7012462	0.163	0.4271	0.9235	0.8123	1.05	0.224	0.4124
8	128527333	rs10109622	0.2547	0.2026	1.054	0.9032	1.231	0.5019	0.7754
8	128527491	rs6996874	0.286	0.1997	1.057	0.9052	1.234	0.4848	0.7685
8	128527826	rs4871791	0.364	0.4378	1.052	0.9297	1.19	0.4218	0.5025
8	128530060	rs7841228	0.3911	0.2742	0.8669	0.7503	1.002	0.05278	0.07682
8	128535996	rs7841264	0.858	0.1785	0.8314	0.7032	0.9831	0.03086	0.09682
8	128540223	rs7830412	0.01663	0.04858	0.7271	0.531	0.9955	0.04682	0.1241
8	128541502	rs1447293	0.1688	0.3563	1.1	0.9689	1.248	0.1413	0.173
8	128544367	rs921146	0.5046	0.1967	1.19	1.023	1.385	0.02384	0.03466
8	128551824	rs4871799	0.1745	0.2246	1.157	1.003	1.336	0.04567	0.05904
8	128554220	rs1447295	0.09546	0.1064	1.217	1.001	1.48	0.04854	0.1122
8	128555770	rs9297758	0.7348	0.3683	1.051	0.9259	1.193	0.441	0.7432
8	128556704	rs10086608	0.2343	0.08494	1.107	0.8928	1.371	0.3552	0.284
8	128561211	rs7831028	0.8877	0.2472	1.145	0.9935	1.319	0.06158	0.1373
8	128563848	rs11775749	0.1811	0.03211	0.8553	0.5939	1.232	0.4011	0.8839
8	128565688	rs16902169	0.7929	0.1841	1.088	0.9296	1.273	0.2935	0.5758
8	128565773	rs13253127	0.05386	0.4319	1.165	1.029	1.318	0.01552	0.001914
8	128565958	rs6985504	0.9442	0.2507	1.144	0.9935	1.317	0.06154	0.1105
8	128568620	rs7831150	0.1896	0.03248	0.8455	0.5873	1.217	0.3665	0.8529
8	128569281	rs723555	0.8616	0.1851	1.072	0.9158	1.254	0.3876	0.6877
8	128573181	rs16902173	0.7457	0.1411	1.028	0.8622	1.226	0.758	0.9244
8	128573679	rs17766217	0.4705	0.3872	0.864	0.7594	0.9829	0.02631	0.04135
8	128576206	rs12155672	0.02357	0.4824	1.147	1.015	1.296	0.02744	0.01435
8	128582727	rs4871808	0.4481	0.1415	1.021	0.8552	1.219	0.8172	0.3816
8	128586755	rs4242382	0.1216	0.1047	1.352	1.114	1.64	0.002279	0.009513
8	128587736	rs4242384	0.06604	0.104	1.347	1.109	1.636	0.002674	0.01071
8	128594450	rs7017300	0.9113	0.1368	1.211	1.017	1.442	0.03186	0.05268
8	128601055	rs11988857	0.5298	0.122	1.267	1.055	1.523	0.01143	0.02037
8	128603769	rs9656967	0.4609	0.1223	1.295	1.08	1.553	0.005274	0.01834
8	128603836	rs9656816	0.4269	0.09072	1.348	1.098	1.654	0.00425	0.01381
8	128606765	rs12542685	1	0.4115	0.8739	0.7704	0.9913	0.03616	0.08671
8	128607399	rs7814251	0.8589	0.1802	0.9899	0.8427	1.163	0.9017	0.955
8	128608330	rs9694093	0.4754	0.3957	1.06	0.9343	1.202	0.367	0.3787
8	128608542	rs7837688	0.2075	0.1053	1.33	1.097	1.612	0.003749	0.01495
8	128614565	rs6991990	0.6849	0.3486	0.8909	0.7824	1.015	0.08147	0.1447
8	128617860	rs13258742	0.06698	0.1434	1.196	1.013	1.411	0.03429	0.1036
8	128619305	rs4407842	0.3967	0.4602	1.049	0.927	1.187	0.4496	0.3835
8	128628172	rs6470530	0.8271	0.4032	0.9261	0.8157	1.051	0.2357	0.4884
8	128633980	rs10098729	0.7725	0.1023	1.084	0.8867	1.325	0.432	0.7089
8	128635324	rs4620244	0.617	0.1554	1.149	0.9739	1.355	0.09961	0.1526
8	128636470	rs11783049	0.5818	0.1066	0.94	0.7659	1.154	0.5537	0.7683
8	128637541	rs6470532	0.4571	0.4562	0.9396	0.8305	1.063	0.3229	0.6134
8	128637894	rs7386167	0.2179	0.3384	1.129	0.9899	1.288	0.07046	0.1834
8	128638038	rs4733655	0.9005	0.2999	0.9404	0.8206	1.078	0.3771	0.5538
8	128640941	rs4313118	0.2146	0.1806	0.9777	0.83	1.152	0.787	0.9611
8	128642092	rs10097522	0.523	0.1742	0.9445	0.8005	1.114	0.4987	0.6241
8	128642480	rs12543106	0.9505	0.3048	0.9217	0.8044	1.056	0.2397	0.4001
8	128647197	rs4733739	0.6924	0.2103	0.95	0.815	1.107	0.5115	0.7094
8	128650508	rs4733766	0.9041	0.3303	0.9346	0.8165	1.07	0.3263	0.4781
8	128658004	rs7824074	0.2922	0.3052	1.023	0.8949	1.17	0.7351	0.4355
8	128660144	rs7815738	1	0.136	0.9034	0.7505	1.088	0.2832	0.5078
8	128667482	rs6470541	0.4887	0.443	0.9482	0.8381	1.073	0.3985	0.667
8	128670554	rs10091329	0.4318	0.1134	0.9458	0.7742	1.156	0.5856	0.7818
8	128672591	rs4129666	0.8891	0.1051	0.9667	0.7879	1.186	0.7453	0.8393
8	128678824	rs7818319	0.8923	0.1092	0.9063	0.7386	1.112	0.3462	0.481
8	128682912	rs4451272	0.05186	0.268	1.129	0.9822	1.299	0.08771	0.1021
8	128693606	rs7388104	0.8328	0.4651	1.011	0.8936	1.143	0.8655	0.7115
8	128696142	rs4551310	0.7075	0.4295	1.012	0.893	1.147	0.8501	0.9602
8	128697783	rs6470552	0.5139	0.08805	0.9203	0.736	1.151	0.4664	0.2512
8	128699771	rs4314620	0.6212	0.1573	0.9665	0.8159	1.145	0.6934	0.1241
8	128706649	rs13268507	0.9574	0.4333	0.9876	0.873	1.117	0.8431	0.369
8	128706798	rs13271223	0.5278	0.4997	1	0.8849	1.13	0.998	0.1042
8	128712413	rs6989963	0.1772	0.42	1.032	0.9103	1.171	0.6205	0.3073
8	128714137	rs4130120	0.866	0.08553	0.9191	0.7335	1.152	0.4637	0.7646
8	128723297	rs10956381	0.03969	0.414	0.993	0.8743	1.128	0.9134	0.2707
8	128724583	rs4733879	0.005426	0.4709	0.9965	0.8843	1.123	0.9537	0.2335
8	128726459	rs11995971	0.4618	0.4962	1.014	0.8952	1.148	0.8315	0.8662
8	128729278	rs7817632	0.7409	0.3932	0.917	0.8075	1.041	0.1816	0.3273
8	128731277	rs4733616	0.3836	0.1844	0.8616	0.7298	1.017	0.07847	0.2109
8	128732901	rs6985681	0.7754	0.36	1.044	0.9198	1.185	0.5059	0.4351
8	128733772	rs4562278	0.9359	0.2108	0.9422	0.8074	1.1	0.4503	0.3292
8	128734662	rs4385433	0.2623	0.3761	0.9985	0.8774	1.136	0.9815	0.9915
8	128746713	rs7841193	0.2472	0.4858	1.006	0.8899	1.137	0.925	0.6687
8	128748168	rs4593503	0.1478	0.125	0.9523	0.7898	1.148	0.609	0.3448
8	128750181	rs12543549	0.4767	0.2835	0.9579	0.8348	1.099	0.5405	0.5202
8	128762703	rs11774100	0.2827	0.3326	1.074	0.9426	1.225	0.2824	0.2615
8	128769526	rs10505504	0.2736	0.3519	1.122	0.9887	1.274	0.07438	0.1614
8	128771858	rs7845292	0.871	0.42	1.088	0.9604	1.233	0.1847	0.4053
8	128774343	rs7840975	0.4153	0.0698	0.9394	0.7338	1.203	0.6202	0.3239
8	128775901	rs4733676	0.6269	0.4182	1.106	0.9768	1.252	0.112	0.2613
8	128777752	rs6470563	0.07212	0.1164	0.8798	0.7241	1.069	0.1975	0.4293
8	128781003	rs4733677	0.882	0.2301	1.042	0.9012	1.206	0.576	0.7649
8	128782355	rs12547643	0.9095	0.3636	0.8302	0.7277	0.947	0.005616	0.01673
8	128783055	rs16902328	1	0.06916	0.7977	0.6143	1.036	0.08985	0.1908
8	128787250	rs9642880	0.5606	0.4736	0.9135	0.807	1.034	0.1528	0.3096
8	128798369	rs7008426	1	0	NA	NA	NA	NA	NA
8	128798770	rs16902346	0.4991	0.04008	1.041	0.7645	1.417	0.8001	0.9553
8	128799680	rs6470565	0.5061	0.0404	1.032	0.7585	1.404	0.8407	0.9636
8	128800265	rs7010365	0.4654	0.03871	1.053	0.7694	1.441	0.7476	0.9414
8	128805881	rs10089430	1	0	NA	NA	NA	NA	NA
8	128807134	rs6989598	0.6927	0.0349	1.085	0.7838	1.503	0.6221	0.7871
8	128807241	rs16902357	1	0.06492	0.8012	0.6125	1.048	0.1058	0.232
8	128808953	rs10505505	0.4139	0.05076	1.026	0.7784	1.353	0.8549	0.9792
8	128810150	rs10108288	0.7181	0.0366	1.051	0.7618	1.449	0.7634	0.8215
8	128812033	rs16902359	0.294	0.1133	0.9173	0.7499	1.122	0.4008	0.6013
8	128813111	rs7013527	1	0.01001	0.7669	0.389	1.512	0.4434	NA
8	128814448	rs16902364	0.6464	0.03108	1.109	0.7865	1.565	0.5545	0.823
8	128815526	rs17187428	0.5912	0.05249	1.247	0.9628	1.615	0.09438	0.2468
8	128816653	rs4645943	0.4279	0.03591	1.232	0.9054	1.675	0.1845	0.3947
8	128817567	rs4645946	1	0.0139	1.268	0.7716	2.082	0.3491	NA
8	128819321	rs3891248	0.7372	0.1369	0.9913	0.8264	1.189	0.9254	0.6437
8	128819394	rs4645956	0.2806	0.09677	0.9333	0.7486	1.164	0.5395	0.661
8	128819595	rs4645958	0.5602	0.1006	0.9408	0.7626	1.161	0.5694	0.7714
8	128821360	rs10110283	1	0.01728	0.9753	0.6015	1.581	0.919	NA
8	128823745	rs4645973	1	0.01174	0.8762	0.4802	1.599	0.6667	NA
8	128824053	rs4645975	1	0	NA	NA	NA	NA	NA
8	128827861	rs7003472	0.6165	0.02559	1.192	0.8207	1.733	0.3558	0.5571
8	128828043	rs12680047	0.2423	0.3819	0.9736	0.8585	1.104	0.6764	0.8229
8	128832046	rs11782002	0.2194	0.3798	0.9652	0.8507	1.095	0.5826	0.6906
8	128832344	rs4733550	0.2068	0.4972	0.9507	0.8416	1.074	0.4168	0.7041
8	128832477	rs10956383	0.2556	0.2234	1.017	0.8779	1.179	0.8198	0.3683
